# Supplementary material for: Replica exchange molecular dynamics simulation of the coordination of Pt(ii)-Phenanthroline to amyloid-β
Source: PubMed Central journal article supplement (PMC9074135; doi:10.1039/c9ra04637b), 2019-10-30
Supplement: RA-009-C9RA04637B-s001.pdf [file RA-009-C9RA04637B-s001.pdf]

## Pt REMD Supplementary data

**Table S1:** MCPB.py forcefield data

```
MASS
M1 195.08          Pt ion
Y1 14.01          sp2 N in 5 memb.ring w/LP (HIS,ADE,GUA)
Y2 14.01          sp2 N in 5 memb.ring w/LP (HIS,ADE,GUA)
Y3 14.01          Sp2 N in pure aromatic systems
Y4 14.01          Sp2 N in pure aromatic systems

BOND
M1-Y3 107.2      2.0597      Created by Seminario method using MCPB.py
M1-Y4 107.3      2.0594      Created by Seminario method using MCPB.py
Y1-M1 127.3      2.0562      Created by Seminario method using MCPB.py
Y2-M1 127.3      2.0562      Created by Seminario method using MCPB.py

ANGL
CR-Y1-M1 138.28  126.69      Created by Seminario method using MCPB.py
CR-Y2-M1 136.04  126.68      Created by Seminario method using MCPB.py
CV-Y1-M1 141.21  126.20      Created by Seminario method using MCPB.py
CV-Y2-M1 139.67  126.19      Created by Seminario method using MCPB.py
M1-Y3-ca 169.55  120.57      Created by Seminario method using MCPB.py
M1-Y4-ca 169.59  120.57      Created by Seminario method using MCPB.py
Y1-M1-Y2 149.86   88.55      Created by Seminario method using MCPB.py
Y1-M1-Y3 159.53   95.41      Created by Seminario method using MCPB.py
Y1-M1-Y4 168.05  175.94      Created by Seminario method using MCPB.py
Y2-M1-Y3 166.27  176.00      Created by Seminario method using MCPB.py
Y2-M1-Y4 156.32   95.47      Created by Seminario method using MCPB.py
Y4-M1-Y3 168.87   80.58      Created by Seminario method using MCPB.py
```

**Table S2:** Pt-N distance statistics for Pt-A $\beta$ 16 (Å)

|            | Ave   | SD    | Min   | Max   |
|------------|-------|-------|-------|-------|
| Pt-His6 N  | 2.062 | 0.058 | 1.771 | 2.352 |
| Pt-His14 N | 2.065 | 0.058 | 1.763 | 2.377 |

**Table S3:** Eigenvalues of the Rg-tensor for 300 K simulations ( $\text{\AA}^2$ )

|     | Pt-A $\beta$ 16 |       |        | Pt-A $\beta$ 42 |       |        |
|-----|-----------------|-------|--------|-----------------|-------|--------|
|     | Eig1            | Eig2  | Eig3   | Eig1            | Eig2  | Eig3   |
| Ave | 9.50            | 19.14 | 55.90  | 18.24           | 32.49 | 97.99  |
| SD  | 1.58            | 4.53  | 15.22  | 3.73            | 6.61  | 45.23  |
| Max | 18.96           | 40.58 | 101.56 | 34.77           | 86.65 | 649.76 |

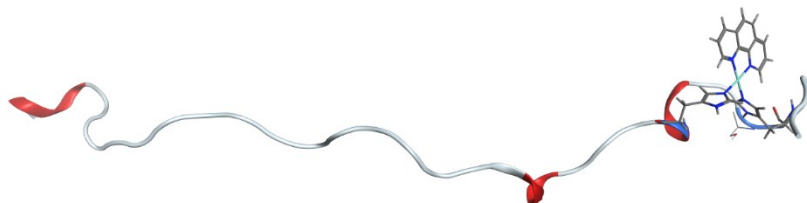

**Figure S1:** Structure of complex with Eig3 =  $650 \text{\AA}^2$

**Table S4: RMSF by residue**

| <b>1-16</b> |        | <b>1-42</b> |         |             |         |
|-------------|--------|-------------|---------|-------------|---------|
| <b>1</b>    | 6.0558 | <b>1</b>    | 12.6565 | <b>23</b>   | 8.2632  |
| <b>2</b>    | 3.9262 | <b>2</b>    | 10.1557 | <b>24</b>   | 6.8617  |
| <b>3</b>    | 3.5999 | <b>3</b>    | 9.0047  | <b>25</b>   | 5.7062  |
| <b>4</b>    | 4.3778 | <b>4</b>    | 8.6911  | <b>26</b>   | 4.9609  |
| <b>5</b>    | 5.0238 | <b>5</b>    | 8.2984  | <b>27</b>   | 6.1602  |
| <b>6</b>    | 2.9798 | <b>6</b>    | 5.2059  | <b>28</b>   | 7.1622  |
| <b>7</b>    | 3.3004 | <b>7</b>    | 7.0491  | <b>29</b>   | 4.4072  |
| <b>8</b>    | 2.8331 | <b>8</b>    | 6.6011  | <b>30</b>   | 4.9004  |
| <b>9</b>    | 2.3164 | <b>9</b>    | 6.23    | <b>31</b>   | 7.075   |
| <b>10</b>   | 3.3683 | <b>10</b>   | 7.4542  | <b>32</b>   | 6.4524  |
| <b>11</b>   | 2.8378 | <b>11</b>   | 6.0822  | <b>33</b>   | 5.2601  |
| <b>12</b>   | 2.7178 | <b>12</b>   | 7.9379  | <b>34</b>   | 7.6428  |
| <b>13</b>   | 3.3749 | <b>13</b>   | 7.6998  | <b>35</b>   | 8.708   |
| <b>14</b>   | 2.7071 | <b>14</b>   | 4.5638  | <b>36</b>   | 7.2621  |
| <b>15</b>   | 3.3672 | <b>15</b>   | 7.8232  | <b>37</b>   | 7.6283  |
| <b>16</b>   | 5.01   | <b>16</b>   | 9.2735  | <b>38</b>   | 7.4299  |
| <b>Pt</b>   | 3.8089 | <b>17</b>   | 8.6368  | <b>39</b>   | 8.2022  |
| <b>phen</b> | 5.5910 | <b>18</b>   | 7.5109  | <b>40</b>   | 8.6588  |
|             |        | <b>19</b>   | 7.9634  | <b>41</b>   | 9.9994  |
|             |        | <b>20</b>   | 7.0989  | <b>42</b>   | 12.0622 |
|             |        | <b>21</b>   | 6.4629  | <b>Pt</b>   | 5.4906  |
|             |        | <b>22</b>   | 7.4429  | <b>phen</b> | 8.2088  |

**Table S5:** salt bridge occurrence (%)

| Pt-A $\beta$ 16 | Asp1 | Glu3 | Asp7 | Glu11 |
|-----------------|------|------|------|-------|
| Arg5            | 6.2  | 76.3 | 7.1  | 8.3   |
| Lys16           | 0.1  | 0.4  | 0.1  | 0.3   |

| Pt-A $\beta$ 42 | Asp1 | Glu3 | Asp7 | Glu11 | Glu22 | Asp23 |
|-----------------|------|------|------|-------|-------|-------|
| Arg5            | 25.0 | 34.4 | 33.4 | 13.8  | 13.2  | 0.1   |
| Lys16           | 0.0  | 0.0  | 0.0  | 0.1   | 1.3   | 0.5   |
| Lys28           | 0.0  | 0.0  | 0.0  | 0.0   | 11.0  | 10.3  |

**Table S6:** Percentage secondary structure

| Pt-A $\beta$ 16 | Coil | Para | Anti | 3,10 | Alpha | Pi | Turn | Bend |
|-----------------|------|------|------|------|-------|----|------|------|
| 1               | 100  | 0    | 0    | 0    | 0     | 0  | 0    | 0    |
| 2               | 97   | 0    | 0    | 1    | 0     | 0  | 1    | 0    |
| 3               | 81   | 0    | 0    | 3    | 1     | 0  | 7    | 8    |
| 4               | 66   | 0    | 0    | 4    | 3     | 0  | 14   | 14   |
| 5               | 58   | 0    | 0    | 3    | 3     | 0  | 9    | 27   |
| 6               | 72   | 0    | 0    | 2    | 3     | 0  | 2    | 21   |
| 7               | 83   | 0    | 0    | 2    | 3     | 0  | 3    | 8    |
| 8               | 1    | 0    | 0    | 28   | 8     | 0  | 41   | 22   |
| 9               | 5    | 0    | 0    | 27   | 8     | 0  | 44   | 16   |
| 10              | 20   | 0    | 0    | 30   | 11    | 0  | 28   | 12   |
| 11              | 7    | 0    | 0    | 38   | 38    | 0  | 14   | 2    |
| 12              | 3    | 0    | 0    | 37   | 52    | 0  | 7    | 1    |
| 13              | 3    | 0    | 0    | 37   | 53    | 0  | 6    | 0    |
| 14              | 5    | 0    | 0    | 16   | 52    | 0  | 21   | 6    |
| 15              | 46   | 0    | 0    | 3    | 39    | 0  | 13   | 0    |
| 16              | 70   | 0    | 0    | 1    | 13    | 0  | 16   | 0    |

| Pt-Aβ42 | Coil | Para | Anti | 3,10 | Alpha | Pi | Turn | Bend |
|---------|------|------|------|------|-------|----|------|------|
| 1       | 100  | 0    | 0    | 0    | 0     | 0  | 0    | 0    |
| 2       | 90   | 0    | 0    | 5    | 3     | 0  | 2    | 0    |
| 3       | 40   | 0    | 0    | 28   | 3     | 0  | 12   | 16   |
| 4       | 34   | 0    | 0    | 29   | 7     | 0  | 20   | 9    |
| 5       | 30   | 0    | 0    | 27   | 10    | 0  | 13   | 20   |
| 6       | 62   | 0    | 0    | 3    | 8     | 0  | 7    | 20   |
| 7       | 39   | 3    | 0    | 1    | 8     | 0  | 16   | 33   |
| 8       | 19   | 0    | 0    | 1    | 16    | 0  | 21   | 41   |
| 9       | 27   | 0    | 0    | 1    | 12    | 0  | 26   | 34   |
| 10      | 55   | 0    | 0    | 1    | 18    | 0  | 17   | 9    |
| 11      | 44   | 0    | 0    | 5    | 23    | 0  | 4    | 24   |
| 12      | 0    | 0    | 0    | 14   | 42    | 0  | 38   | 5    |
| 13      | 2    | 0    | 0    | 14   | 43    | 0  | 38   | 2    |
| 14      | 20   | 0    | 0    | 14   | 42    | 0  | 20   | 5    |
| 15      | 24   | 0    | 0    | 5    | 43    | 0  | 6    | 23   |
| 16      | 4    | 2    | 0    | 15   | 47    | 0  | 27   | 5    |
| 17      | 8    | 1    | 0    | 14   | 43    | 0  | 20   | 13   |
| 18      | 3    | 2    | 0    | 19   | 46    | 0  | 27   | 3    |
| 19      | 6    | 0    | 0    | 13   | 46    | 0  | 15   | 19   |
| 20      | 8    | 20   | 0    | 9    | 37    | 0  | 13   | 12   |
| 21      | 28   | 14   | 0    | 1    | 33    | 0  | 2    | 21   |
| 22      | 2    | 13   | 0    | 22   | 34    | 0  | 21   | 8    |
| 23      | 2    | 0    | 0    | 24   | 32    | 0  | 27   | 15   |
| 24      | 2    | 0    | 0    | 24   | 23    | 0  | 33   | 18   |
| 25      | 24   | 0    | 0    | 13   | 8     | 0  | 28   | 27   |
| 26      | 51   | 1    | 0    | 1    | 4     | 0  | 4    | 38   |
| 27      | 6    | 0    | 0    | 5    | 33    | 0  | 43   | 13   |
| 28      | 2    | 0    | 0    | 5    | 51    | 0  | 37   | 5    |
| 29      | 2    | 0    | 0    | 6    | 76    | 0  | 14   | 2    |
| 30      | 1    | 0    | 0    | 4    | 90    | 0  | 4    | 1    |
| 31      | 0    | 0    | 0    | 3    | 93    | 0  | 4    | 0    |
| 32      | 0    | 0    | 0    | 2    | 94    | 0  | 3    | 0    |
| 33      | 2    | 0    | 0    | 5    | 86    | 0  | 6    | 2    |
| 34      | 1    | 0    | 0    | 10   | 77    | 0  | 11   | 1    |
| 35      | 1    | 0    | 1    | 10   | 69    | 0  | 18   | 1    |
| 36      | 1    | 0    | 1    | 9    | 50    | 0  | 35   | 3    |
| 37      | 15   | 0    | 0    | 4    | 9     | 0  | 65   | 6    |
| 38      | 34   | 0    | 0    | 19   | 3     | 0  | 31   | 12   |
| 39      | 24   | 22   | 1    | 19   | 3     | 0  | 21   | 10   |
| 40      | 28   | 18   | 1    | 18   | 3     | 0  | 20   | 13   |
| 41      | 70   | 15   | 1    | 3    | 2     | 0  | 9    | 0    |
| 42      | 100  | 0    | 0    | 0    | 0     | 0  | 0    | 0    |

**Table S7:** Backbone hydrogen bond statistics

i+4 --&gt; i

| Donor    | Acceptor | %age | Dist | Angle |
|----------|----------|------|------|-------|
| GLY_29@O | GLY_33@N | 37%  | 2.87 | 157.4 |
| GLU_11@O | GLN_15@N | 23%  | 2.87 | 157.5 |
| ILE_32@O | VAL_36@N | 21%  | 2.89 | 161.0 |
| ALA_30@O | LEU_34@N | 20%  | 2.89 | 157.3 |
| LYS_28@O | ILE_32@N | 17%  | 2.90 | 163.8 |
| GLY_33@O | GLY_37@N | 17%  | 2.87 | 152.4 |
| GLN_15@O | PHE_19@N | 15%  | 2.89 | 161.0 |
| ILE_31@O | MET_35@N | 15%  | 2.89 | 158.4 |
| ALA_21@O | GLY_25@N | 14%  | 2.85 | 153.9 |
| LYS_16@O | PHE_20@N | 13%  | 2.89 | 160.4 |
| LEU_17@O | ALA_21@N | 12%  | 2.89 | 158.5 |
| SER_26@O | ALA_30@N | 10%  | 2.89 | 158.1 |
| TYR_10@O | HD2_14@N | 10%  | 2.87 | 155.7 |
| VAL_12@O | LYS_16@N | 10%  | 2.89 | 159.4 |
| ASP_7@O  | GLU_11@N | 7%   | 2.88 | 158.8 |
| PHE_20@O | VAL_24@N | 7%   | 2.90 | 161.6 |
| PHE_19@O | ASP_23@N | 7%   | 2.89 | 159.0 |
| VAL_18@O | GLU_22@N | 7%   | 2.89 | 158.7 |
| HID_13@O | LEU_17@N | 6%   | 2.90 | 160.2 |
| ASN_27@O | ILE_31@N | 5%   | 2.90 | 161.0 |
| HD2_14@O | VAL_18@N | 4%   | 2.90 | 161.2 |
| PHE_4@O  | SER_8@N  | 3%   | 2.89 | 160.6 |
| GLY_38@O | ALA_42@N | 2%   | 2.89 | 161.1 |

i+3 --&gt; i

| Donor    | Acceptor | %age | Dist | Angle |
|----------|----------|------|------|-------|
| GLU_11@O | HD2_14@N | 17%  | 2.87 | 153.7 |
| GLN_15@O | VAL_18@N | 12%  | 2.89 | 152.4 |
| GLU_3@O  | HD1_6@N  | 11%  | 2.89 | 158.4 |
| SER_26@O | GLY_29@N | 8%   | 2.90 | 152.5 |
| GLU_22@O | GLY_25@N | 7%   | 2.90 | 153.3 |
| ILE_32@O | MET_35@N | 7%   | 2.90 | 149.3 |
| ALA_21@O | VAL_24@N | 6%   | 2.91 | 157.4 |
| LEU_17@O | PHE_20@N | 6%   | 2.90 | 155.3 |
| LYS_28@O | ILE_31@N | 6%   | 2.90 | 148.2 |
| GLY_33@O | VAL_36@N | 6%   | 2.91 | 151.4 |
| GLY_38@O | ILE_41@N | 4%   | 2.91 | 158.9 |
| LEU_34@O | GLY_37@N | 4%   | 2.91 | 152.4 |
| GLY_29@O | ILE_32@N | 4%   | 2.90 | 149.1 |
| MET_35@O | GLY_38@N | 4%   | 2.90 | 151.6 |
| ILE_31@O | LEU_34@N | 3%   | 2.91 | 149.4 |
| LYS_16@O | PHE_19@N | 3%   | 2.91 | 151.3 |
| HD2_14@O | LEU_17@N | 3%   | 2.91 | 154.7 |
| ASN_27@O | ALA_30@N | 3%   | 2.91 | 151.1 |

|          |          |    |      |       |
|----------|----------|----|------|-------|
| ASP_23@O | SER_26@N | 3% | 2.91 | 156.6 |
| ASP_7@O  | TYR_10@N | 2% | 2.89 | 148.5 |

i+5 --> i

| Donor    | Acceptor | %age | Dist | Angle |
|----------|----------|------|------|-------|
| GLY_33@O | GLY_38@N | 15%  | 2.87 | 151.7 |
| LEU_34@O | VAL_39@N | 4%   | 2.90 | 154.5 |
| ALA_21@O | SER_26@N | 2%   | 2.89 | 155.3 |
